# Supplementary material for: Tetrahedral chain ordering and low dimensional magnetic lattice in a new brownmillerite Sr2ScFeO5
Source: Royal Society of Chemistry journal article supplement (doi:10.1039/c9cc05158a), 2019-01-01
Supplement: c9cc05158a1.pdf [file c9cc05158a1.pdf]

## Supporting Information

### Tetrahedral Chain Ordering and Low Dimensional Magnetic Lattice in a New Brownmillerite $\text{Sr}_2\text{ScFeO}_5$

Sourav Marik<sup>a\*</sup>, Bruno Gonano<sup>a</sup>, Fabien Veillon<sup>a</sup>, Yohann Breard<sup>a</sup>, Denis Pelloquin<sup>a</sup>, Vincent Hardy<sup>a</sup>, Guillaume Clet<sup>b</sup>, Jean Marie Le Breton<sup>c</sup>

<sup>a</sup>Laboratory Crismat, UMR6508 CNRS ENSICAEN, 6 bd Maréchal Juin, 14050 Caen cedex 4, France.

<sup>b</sup>Laboratoire Catalyse et Spectrochimie, ENSICAEN, Université de Caen, CNRS, 6 bd du Maréchal Juin, 14050 CAEN, France.

<sup>c</sup>Groupe de Physique des Matériaux, UMR 6634 CNRS - Université de Rouen, Site universitaire du Madrillet, avenue de l'Université - BP 12, 76801 Saint Etienne du Rouvray Cedex France.

### Experimental Section

**Synthesis.** The brownmillerite  $\text{Sr}_2\text{ScFeO}_5$  was synthesized by the standard solid-state reaction route, using in the stoichiometric amounts of SrO (99.9%)  $\text{Fe}_2\text{O}_3$  (99.99%), and  $\text{Sc}_2\text{O}_3$  (99.99%). All these oxides were carefully mixed in a glove box under nitrogen atmosphere. The mixture was then pressed in the form of bars, which are subsequently introduced into an alumina finger and sealed in an evacuated quartz tube. The sample was then heated at 1200°C for 24 hours followed by a slow cooling to room temperature in 48 hours.

**Raman Spectroscopy.** Raman spectra of the powder sample were recorded on a Horiba Labram HR Evolution, using a 532 nm excitation, ca. 5 mW on the sample, in 60 s with 2 accumulations.

**Crystal Structure Characterization.** X-ray diffraction pattern is collected at room temperature in an X'pert Pro diffractometer working with the  $\text{CuK}_\alpha$  radiation. The samples for electron microscopy were prepared by dispersing of a small quantity of powder in butanol and depositing obtained suspension on Ni carbon holly grid. Lattice constants and space group were deduced from Electron Diffraction data collected on JEOL 2010. The study High-angle annular dark-field scanning transmission electron microscopy (HAADF-STEM) and the atomic level energy-dispersive X-ray spectroscopy (EDS) analyses (mapping) were performed on a JEOL ARM-200F cold FEG probe image aberration corrected microscope operated at 200 kV and equipped with a large solid-angle CENTURIO EDX detector. The oxygen stoichiometry was determined by means of cerimetric titration method [1], the tolerance on the measurement being estimated to 5%.

**Magnetic Measurements and Heat Capacity.** Direct current (dc) magnetization and ac susceptibility measurements were performed by using a Quantum Design superconducting quantum interference device (MPMS, Quantum Design). Specific-heat measurement was performed by using the two-tau time-relaxation method using the PPMS in zero magnetic field.

**Dielectric Measurement.** The dielectric measurement were carried out as a function of temperature and magnetic field for various frequencies using an LCR meter (Agilent 4284A) with a home-made sample insert for a Physical Properties Measurement System (PPMS,

Quantum Design). Silver paint was used to make the parallel plate capacitor of a pressed rectangular shaped polycrystalline sample.

**Mössbauer spectroscopy.** The  $^{57}\text{Fe}$  Mössbauer spectra at 4.2 K was recorded in transmission mode, using a conventional spectrometer operating in the constant acceleration mode from -2.5 to 2.5 mm/s.  $^{57}\text{Co/Rh}$  was used as the  $\gamma$ -ray source.

[1] T. Motohashi, B. Raveau, M. Hervieu, A. Maignan, V. Pralong, N. Nguyen, V. Caignaert, J. Phys. Cond. Mat. 18 (2006) 2157-2171.

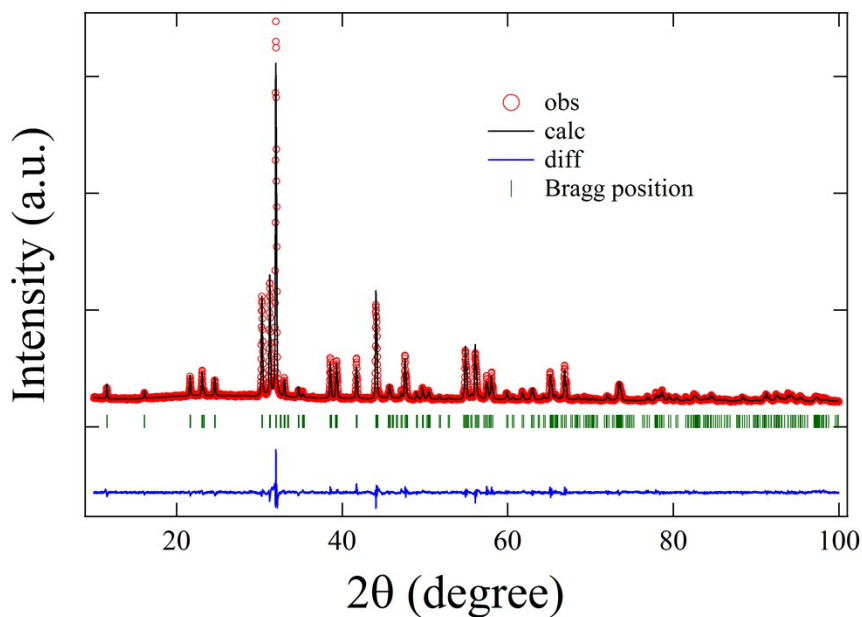

**Figure S1.** Rietveld refinement fit of the room temperature powder X-ray diffraction pattern for  $\text{Sr}_2\text{ScFeO}_5$ .

Table 1. Atomic and structural parameters as determined from the Rietveld refined using the room temperature XRD pattern.

|    | x         | y         | z         | B <sub>iso</sub> | Occ. |
|----|-----------|-----------|-----------|------------------|------|
| Sr | 0.0192(1) | 0.1122(1) | 0.5157(1) | 2.2(1)           | 1.0  |
| Sc | 0         | 0         | 0         | 1.4(1)           | 1.0  |
| Fe | 0.9323(4) | 0.25      | 0.988(1)  | 1.2(1)           | 1.0  |
| O1 | 0.271(2)  | 0.9864(5) | 0.287(2)  | 0.7              | 1.0  |
| O2 | 0.0693(1) | 0.1447(4) | 0.0352(2) | 0.3              | 1.0  |
| O3 | 0.823(2)  | 0.25      | 0.660(2)  | 0.5              | 1.0  |

$\chi^2 = 4.59$ ,  $R_p = 2.04\%$ ,  $R_{wp} = 2.94\%$ ,  $R_{Bragg} = 5.47$

Space group: *Ibm2*,  $a = 5.8965$  (1) Å,  $b = 15.2769$  (4) Å and  $c = 5.7213$  (1) Å

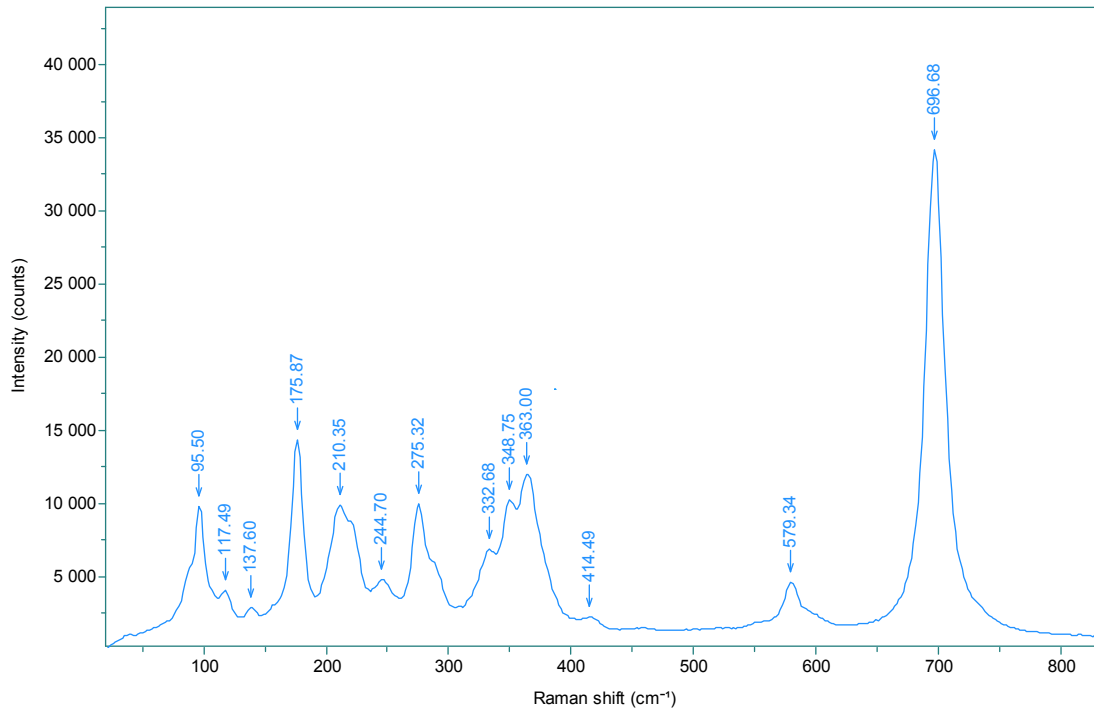

**Figure S2.** Room temperature Raman spectrum of Sr<sub>2</sub>ScFeO<sub>5</sub>.

The Raman spectrum shows several peaks of comparable intensities below  $400\text{ cm}^{-1}$  with only two peaks above  $420\text{ cm}^{-1}$ , a main intense band at  $697\text{ cm}^{-1}$  and a small band at  $579\text{ cm}^{-1}$ .

Although the Raman spectrum of this compound has not been reported before, it can be compared to that of the related Brownmillerite  $\text{SrFeO}_{2.5}$  [1]. The spectrum of  $\text{SrFeO}_{2.5}$  shows several peaks between  $400$  and  $600\text{ cm}^{-1}$  which are nearly absent in the spectrum of  $\text{Sr}_2\text{ScFeO}_5$ . Following the studies of several iron oxide compounds, bands in this region were assigned to the presence of  $\text{FeO}_6$  octahedra while  $\text{FeO}_4$  tetrahedra are expected between  $660$  and  $720\text{ cm}^{-1}$  [2]. The absence of noticeable bands between  $400$  and  $570\text{ cm}^{-1}$  likely indicates the absence of iron in octahedral environment. From the computed values of the  $A_g$  modes for  $\text{CaFeO}_{2.5}$  [1], the bands at  $579$  and  $697\text{ cm}^{-1}$  can be attributed to the vibrations of iron in tetrahedral environment. The strong band at  $697\text{ cm}^{-1}$  and its large relative intensity compared to bands around  $400\text{ cm}^{-1}$  is consistent with the prominent presence of iron in tetrahedral environment.

Regarding the presence of scandium in the structure,  $\text{Sc}_2\text{O}_3$  was reported to yield bands around  $420\text{ cm}^{-1}$  [3]. Similarly, scandium in octahedral environment is expected to yield bands in the same region [4]. Some of the bands between  $320$  and  $420\text{ cm}^{-1}$  must thus be indicative of  $\text{ScO}_6$  groups.

#### References

- [1] Andrea Piovano, Monica Ceretti, Mark R Johnson, Giovanni Agostini, Werner Paulus and Carlo Lamberti, *J. Phys.: Condens. Matter* 2015, 27, 225403.
- [2] J. Kreisel, G. Lucazeau and H. Vincent, *Journal of Solid State Chemistry*, 1998, 137, 127–137.
- [3] J A. Ubaldini and M. M. Carnasciali, *Journal of Alloys and Compounds*, 2008, 454, 374–378.
- [4] W. W. Rudolph and C. C. Pye, *J. Phys. Chem. A*, 2000, 104, 1627–1639.

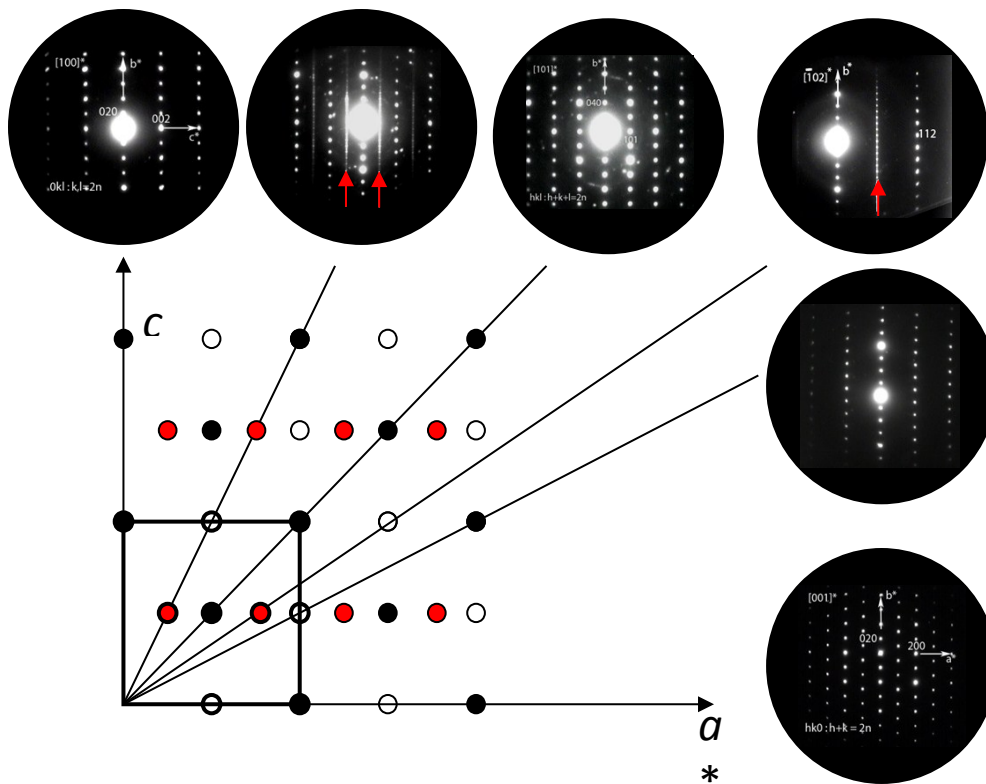

**Figure S3a.** Room temperature electron diffraction patterns along different zone axis and the reciprocal space reconstruction for  $\text{Sr}_2\text{ScFeO}_5$  [ $\text{Ibm}2(\alpha 00)0s0$  superspace group with the modulation vector  $q = \alpha a^* + \beta b^*$ ].

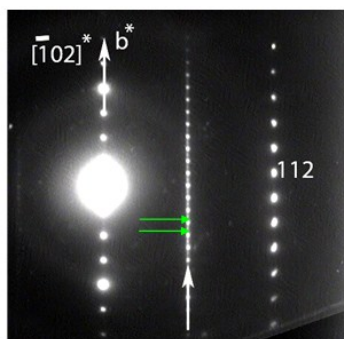

**Figure S3b.** Doubling of the cell parameters along the stacking  $b^*$  axis is highlighted for brownmillerite  $\text{Sr}_2\text{ScFeO}_5$ .

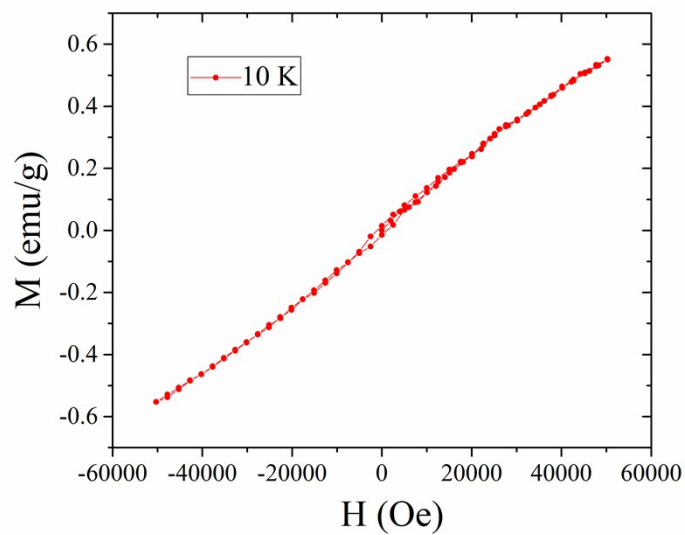

**Figure S4.** Magnetic field variation of the magnetization for the brownmillerite  $\text{Sr}_2\text{ScFeO}_5$ .

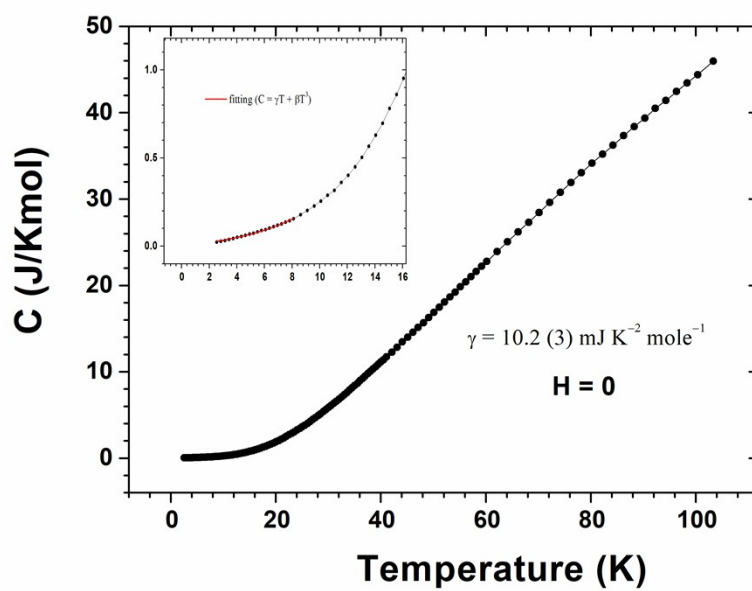

**Figure S5.** The temperature dependence of the specific heat data for the brownmillerite  $\text{Sr}_2\text{ScFeO}_5$ .

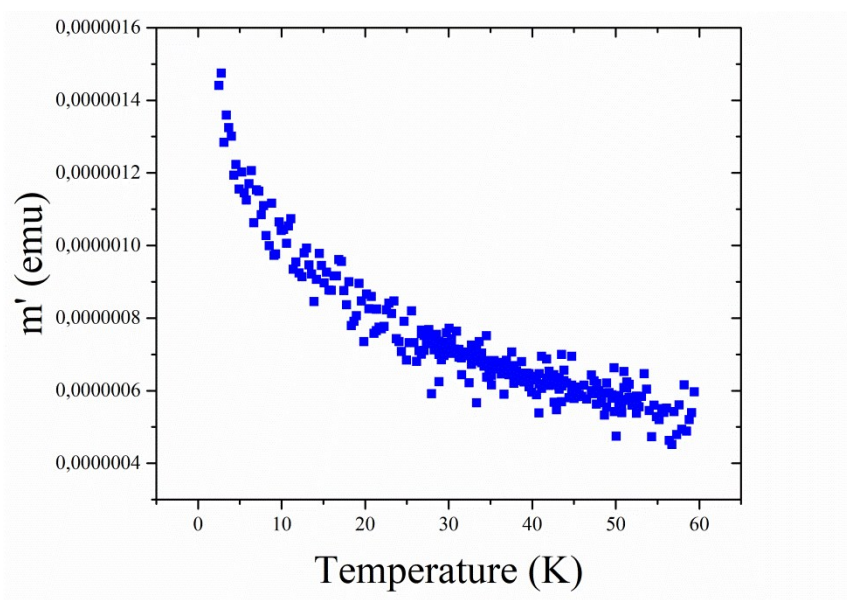

**Figure S6.** Temperature variation of the ac susceptibility ( $f = 999$  Hz, ac excitation field = 1 Oe) for the brownmillerite  $\text{Sr}_2\text{ScFeO}_5$ .

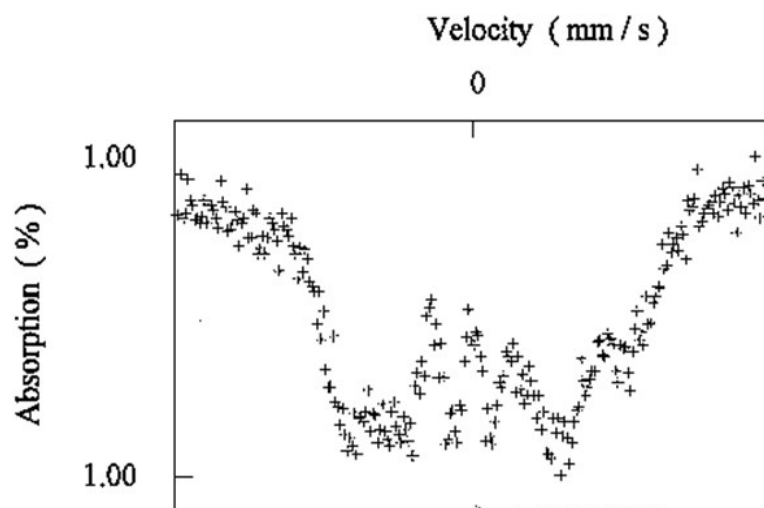

**Figure S7.** The Mössbauer spectrum at 4.2 K for the brownmillerite  $\text{Sr}_2\text{ScFeO}_5$ , shows the absence of magnetic order (absence of a well-defined sextuplet) at low temperature.
